# Supplementary material for: The evolution of host-symbiont dependence
Source: PubMed Central journal article supplement (PMC5500886; doi:10.1038/ncomms15973), 2017-07-04
Supplement: ncomms15973-s1.pdf [file ncomms15973-s1.pdf]

**Title of file for HTML:** Supplementary Information

**Description:** Supplementary Figures, Supplementary Tables and Supplementary References

**Title of file for HTML:** Supplementary Data 1

**Description:** Supplementary R code

**Title of file for HTML:** Peer Review File

**Description:**

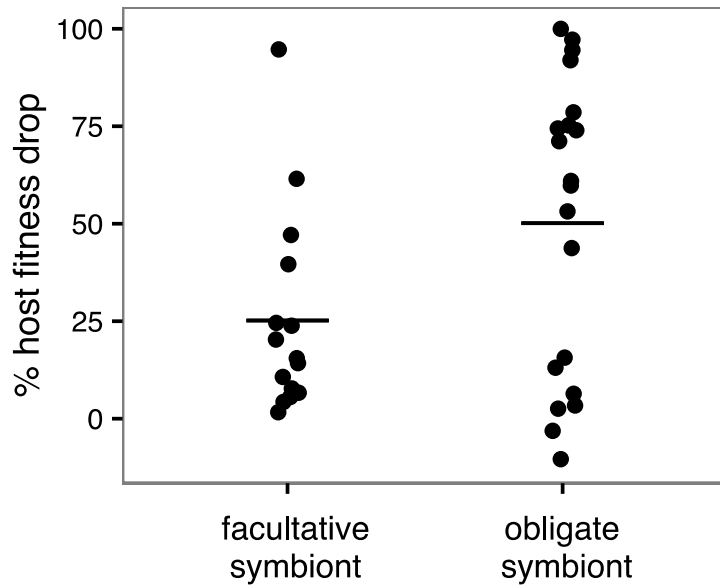

**Supplementary Figure 1. Obligate symbionts lead to a higher reduction in host fitness when removed.** Each data point represents one host-symbiont combination and the mean % host fitness reduction for symbionts that are facultative and obligate are shown as horizontal bars (facultative symbiont = 25.19 and obligate symbiont = 47.49). Mean host fitness reduction was higher for hosts with obligate symbionts (symbiont phylogeny: BPMM, posterior mode = -23.95, CI = -48.36, 10.64, pMCMC = 0.02).  $N_{\text{symbioses}} = 35$  and  $N_{\text{datapoints}} = 284$ .

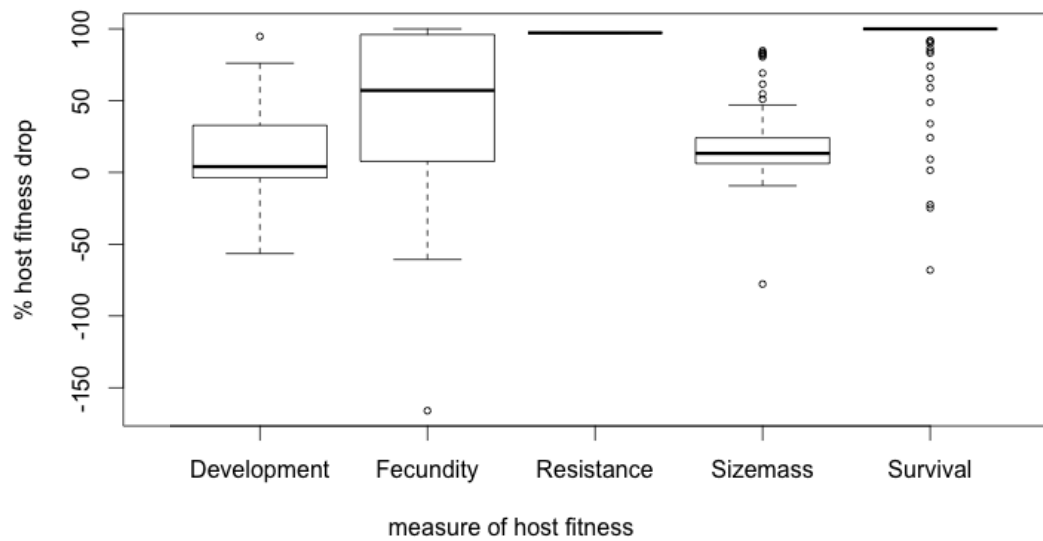

**Supplementary Figure 2. No differences in host fitness drop between different methods of measuring host fitness.** Mean % host fitness drop for each of the 5 categories of how host fitness was measured. In our sensitivity analyses, we removed the category ‘resistance’ due to the fact we only had one observation of host fitness measured in this way. We found no overall differences in % host fitness drop between different methods of measuring host fitness, when controlling for both symbiont and host phylogeny (Supplementary Tables 8 and 9). Bold horizontal bars show the median value for each treatment, boxes show the first and third quartiles and whiskers show the minimum and maximum values.

**Supplementary Table 1.** Summary of full dataset. Raw means are presented for % host fitness drop and symbiont genome size for each level of each fixed effect.

|                            |               | Mean host fitness drop | Mean symbiont genome size (Mb) |
|----------------------------|---------------|------------------------|--------------------------------|
| <b>Transmission mode</b>   | Horizontal    | 21.18                  | 7.09                           |
|                            | Vertical      | 51.78                  | 1.52                           |
| <b>Symbiont function</b>   | Nutritional   | 42.71                  | 2.12                           |
|                            | Defensive     | 28.25                  | 2.49                           |
| <b>Intra/extracellular</b> | Intracellular | 38.56                  | 2.13                           |
|                            | Extracellular | 56.06                  | 3.45                           |

**Supplementary Table 2.** Analysis of the effect of transmission mode, intra/extracellular and symbiont function on fitness drop of host on symbiont removal and symbiont genome size, taking into account symbiont phylogenetic relationships using MCMCglmm.  $N_{\text{symbioses}} = 106$ ,  $N_{\text{symbiont species}} = 58$ ,  $N_{\text{studies}} = 84$ ,  $N_{\text{datapoints}} = 378$ .

| <b>Response: Fitness drop</b> |                                      |          |                            |                  |
|-------------------------------|--------------------------------------|----------|----------------------------|------------------|
| <b>Fixed Effect</b>           |                                      | <b>N</b> | <b>Posterior mode (CI)</b> | <b>pMCMC</b>     |
| Transmission mode             | Horizontal                           | 125      | 14.33 (-32.64, 57.09)      |                  |
|                               | Vertical                             | 253      | 46.65 (13.66, 84.20)       |                  |
|                               | Difference                           |          | -36.58 (-67.54, -8.45)     | <b>0.01</b>      |
| Intra/extracellular           | Intracellular                        | 269      | -15.05 (-56.12, 32.29)     |                  |
|                               | Extracellular                        | 109      | 12.55 (-40.43, 50.96)      |                  |
|                               | Difference                           |          | 19.10 (-3.88, 49.16)       | <b>0.07</b>      |
| Function                      | Defensive                            | 27       | 7.28 (-41.41, 50.63)       |                  |
|                               | Nutritional                          | 207      | 41.98 (11.60, 67.08)       |                  |
|                               | Unknown                              | 144      | 24.98 (-12.63, 68.87)      |                  |
|                               | Difference (Defensive & Nutritional) |          | -28.75 (-66.80, 2.79)      | <b>0.03</b>      |
| <b>Response: Genome size</b>  |                                      |          |                            |                  |
| <b>Fixed Effect</b>           |                                      | <b>N</b> | <b>Posterior mode</b>      | <b>pMCMC</b>     |
| Transmission mode             | Horizontal                           | 125      | 8.46 (5.87, 9.96)          |                  |
|                               | Vertical                             | 253      | 2.77 (0.83, 4.41)          |                  |
|                               | Difference                           |          | -5.56 (-6.74, -4.10)       | <b>&lt;0.001</b> |
| Intra/extracellular           | Intracellular                        | 269      | 6.27 (4.68, 8.85)          |                  |
|                               | Extracellular                        | 109      | 8.44 (6.04, 9.93)          |                  |
|                               | Difference                           |          | 1.34 (0.06, 2.85)          | <b>0.03</b>      |
| Function                      | Defensive                            | 27       | 8.07 (5.84, 9.93)          |                  |
|                               | Nutritional                          | 207      | 7.74 (6.44, 9.85)          |                  |
|                               | Unknown                              | 144      | 8.79 (7.29, 11.38)         |                  |
|                               | Difference (Defensive & Nutritional) |          | -0.08 (-1.47, 1.65)        | <b>0.52</b>      |
| <b>Correlations</b>           |                                      |          |                            |                  |
| Fitness drop : Genome size    | Phylogenetic correlation             |          | 0.02 (-16.23, 3.75)        | <b>0.38</b>      |
|                               | Phenotypic correlation               |          | 0.03 (-0.20, 0.20)         | <b>0.51</b>      |

**Supplementary Table 3.** Analysis of the effect of transmission mode, intra/extracellular and symbiont function on fitness drop of host on symbiont removal and symbiont genome size, taking into account host phylogenetic relationships using MCMCglmm.  $N_{\text{symbioses}} = 106$ ,  $N_{\text{host species}} = 89$ ,  $N_{\text{studies}} = 84$ ,  $N_{\text{datapoints}} = 378$ .

| <b>Response: Fitness drop</b> |                                      |          |                            |                  |
|-------------------------------|--------------------------------------|----------|----------------------------|------------------|
| <b>Fixed Effect</b>           |                                      | <b>N</b> | <b>Posterior mode (CI)</b> | <b>pMCMC</b>     |
| Transmission mode             | Horizontal                           | 125      | 6.98 (-40.04, 40.73)       |                  |
|                               | Vertical                             | 253      | 44.13 (6.58, 77.69)        |                  |
|                               | Difference                           |          | -39.33 (-67.96, -9.13)     | <b>0.003</b>     |
| Intra/extracellular           | Intracellular                        | 269      | -20.30 (-54.07, 21.18)     |                  |
|                               | Extracellular                        | 109      | 0.48 (-32.24, 46.09)       |                  |
|                               | Difference                           |          | 20.16 (-6.31, 44.57)       | <b>0.06</b>      |
| Function                      | Defensive                            | 27       | 5.18 (-37.09, 42.21)       |                  |
|                               | Nutritional                          | 207      | 38.28 (9.70, 62.06)        |                  |
|                               | Unknown                              | 144      | 23.57 (-10.76, 62.47)      |                  |
|                               | Difference (Defensive & Nutritional) |          | -24.93 (-63.44, -4.84)     | <b>0.01</b>      |
| <b>Response: Genome size</b>  |                                      |          |                            |                  |
| <b>Fixed Effect</b>           |                                      | <b>N</b> | <b>Posterior mode</b>      | <b>pMCMC</b>     |
| Transmission mode             | Horizontal                           | 125      | 7.97 (5.72, 9.27)          |                  |
|                               | Vertical                             | 253      | 3.41 (1.94, 4.97)          |                  |
|                               | Difference                           |          | 4.21 (3.09, 5.56)          | <b>&lt;0.001</b> |
| Intra/extracellular           | Intracellular                        | 269      | 6.30 (4.46, 7.96)          |                  |
|                               | Extracellular                        | 109      | 7.78 (6.07, 9.61)          |                  |
|                               | Difference                           |          | -0.0001 (0.27, 2.74)       | <b>0.005</b>     |
| Function                      | Defensive                            | 27       | 8.14 (6.02, 9.58)          |                  |
|                               | Nutritional                          | 207      | 7.17 (5.59, 9.08)          |                  |
|                               | Unknown                              | 144      | 8.07 (6.50, 10.33)         |                  |
|                               | Difference (Defensive & Nutritional) |          | 0.52 (-0.64, 1.60)         | <b>0.19</b>      |
| <b>Correlations</b>           |                                      |          |                            |                  |
| Fitness drop : Genome size    | Phylogenetic correlation             |          | -0.62 (-0.84, 0.89)        | <b>0.49</b>      |
|                               | Phenotypic correlation               |          | -0.01 (-0.21, 0.19)        | <b>0.53</b>      |

**Supplementary Table 4.** Analysis of the effect of transmission mode, intra/extracellular and symbiont function on fitness drop of host on symbiont removal and symbiont genome size, taking into account symbiont phylogenetic relationships using MCMCglmm.  $N_{\text{symbioses}} = 106$ ,  $N_{\text{symbiont species}} = 58$ ,  $N_{\text{studies}} = 84$ ,  $N_{\text{datapoints}} = 378$ , with transmission specific correlations between genome size and host fitness drop.

**Response: Fitness drop**

| Fixed Effect        |               | N   | Posterior mode (CI)    | pMCMC        |
|---------------------|---------------|-----|------------------------|--------------|
| Transmission mode   | Horizontal    | 125 | 0.14 (-36.70, 51.90)   |              |
|                     | Vertical      | 253 | 55.52 (10.88, 92.76)   |              |
|                     | Difference    |     | -41.16 (-75.87, -8.72) | <b>0.007</b> |
| Intra/extracellular | Intracellular | 269 | -5.29 (-55.99, 26.93)  |              |
|                     | Extracellular | 109 | 7.47 (-33.77, 51.33)   |              |
|                     | Difference    |     | 17.60 (-7.24, 46.55)   | <b>0.08</b>  |
| Function            | Defensive     | 27  | 6.62 (-39.82, 48.97)   |              |
|                     | Nutritional   | 207 | 42.38 (11.57, 68.79)   |              |
|                     | Unknown       | 144 | 19.42 (-13.28, 70.13)  |              |
|                     | Difference    |     | -36.54 (-68.65, 4.93)  | <b>0.05</b>  |

**Response: Genome size**

| Fixed Effect        |                                      | N   | Posterior mode (CI) | pMCMC        |
|---------------------|--------------------------------------|-----|---------------------|--------------|
| Transmission mode   | Horizontal                           | 125 | 8.15 (5.23, 12.19)  |              |
|                     | Vertical                             | 253 | 3.35 (1.56, 4.65)   |              |
|                     | Difference                           |     | 4.63 (1.86, 8.68)   | <b>0.008</b> |
| Intra/extracellular | Intracellular                        | 269 | 6.43 (3.10, 10.20)  |              |
|                     | Extracellular                        | 109 | 8.52 (5.08, 12.43)  |              |
|                     | Difference                           |     | 1.92 (0.71, 3.12)   | <b>0.003</b> |
| Function            | Defensive                            | 27  | 8.48 (5.01, 12.17)  |              |
|                     | Nutritional                          | 207 | 7.12 (4.35, 11.16)  |              |
|                     | Unknown                              | 144 | 8.80 (5.56, 12.45)  |              |
|                     | Difference (Defensive & Nutritional) |     | 0.46 (-0.73, 1.76)  | <b>0.19</b>  |

**Transmission specific correlations**

|                            |            |                      |             |
|----------------------------|------------|----------------------|-------------|
| Fitness drop : Genome size | Horizontal | 1.03 (-31.51, 61.49) |             |
|                            | Vertical   | -0.14 (-30.54, 6.65) |             |
|                            | Difference | 1.17 (-0.98, 54.85)  | <b>0.25</b> |

**Supplementary Table 5.** Analysis of the effect of transmission mode, intra/extracellular and symbiont function on fitness drop of host on symbiont removal and symbiont genome size, taking into account host phylogenetic relationships using MCMCglmm.  $N_{\text{symbioses}} = 106$ ,  $N_{\text{symbiont species}} = 89$ ,  $N_{\text{studies}} = 84$ ,  $N_{\text{datapoints}} = 378$ , with transmission specific correlations between genome size and host fitness drop.

| <b>Response: Fitness drop</b>             |                                      |          |                            |                  |
|-------------------------------------------|--------------------------------------|----------|----------------------------|------------------|
| <b>Fixed Effect</b>                       |                                      | <b>N</b> | <b>Posterior mode (CI)</b> | <b>pMCMC</b>     |
| Transmission mode                         | Horizontal                           | 125      | 0.06 (-32.27, 40.46)       |                  |
|                                           | Vertical                             | 258      | 37.39 (9.12, 78.69)        |                  |
|                                           | Difference                           |          | -32.75 (-77.23, -7.87)     | <b>0.03</b>      |
| Intra/extracellular                       | Intracellular                        | 274      | -10.12 (-52.38, 22.97)     |                  |
|                                           | Extracellular                        | 109      | 4.91 (-33.16, 50.38)       |                  |
|                                           | Difference                           |          | 16.65 (-4.96, 46.05)       | <b>0.08</b>      |
| Function                                  | Defensive                            | 27       | -0.93 (-40.38, 39.37)      |                  |
|                                           | Nutritional                          | 212      | 33.30 (10.67, 64.44)       |                  |
|                                           | Unknown                              | 144      | 30.79 (-16.18, 58.46)      |                  |
|                                           | Difference (Defensive & Nutritional) |          | -38.28 (-62.70, -7.37)     | <b>0.01</b>      |
| <b>Response: Genome size</b>              |                                      |          |                            |                  |
| <b>Fixed Effect</b>                       |                                      | <b>N</b> | <b>Posterior mode (CI)</b> | <b>pMCMC</b>     |
| Transmission mode                         | Horizontal                           | 125      | 7.95 (3.52, 13.01)         |                  |
|                                           | Vertical                             | 258      | 3.95 (2.44, 4.88)          |                  |
|                                           | Difference                           |          | 4.07 (-0.51, 8.78)         | <b>0.04</b>      |
| Intra/extracellular                       | Intracellular                        | 274      | 5.65 (2.24, 10.20)         |                  |
|                                           | Extracellular                        | 109      | 7.84 (4.07, 11.84)         |                  |
|                                           | Difference                           |          | 1.31 (0.07, 2.58)          | <b>&lt;0.001</b> |
| Function                                  | Defensive                            | 27       | 8.24 (4.19, 12.20)         |                  |
|                                           | Nutritional                          | 212      | 7.29 (2.97, 10.96)         |                  |
|                                           | Unknown                              | 144      | 8.74 (4.85, 12.75)         |                  |
|                                           | Difference (Defensive & Nutritional) |          | 0.98 (0.44, 1.53)          | <b>&lt;0.001</b> |
| <b>Transmission specific correlations</b> |                                      |          |                            |                  |
| Fitness drop : Genome size                | Horizontal                           |          | 0.15 (-38.88, 49.94)       |                  |
|                                           | Vertical                             |          | -0.11 (-23.30, 8.47)       |                  |
|                                           | Difference                           |          | 0.72 (-42.59, 58.77)       | <b>0.37</b>      |

**Supplementary Table 6.** Analysis of the effect of transmission mode and age of symbiosis on fitness drop of host on symbiont removal and symbiont genome size, taking into account symbiont phylogenetic relationships using MCMCglmm. This analysis uses a subset of the dataset where we have data on age of symbiosis:  $N_{\text{symbioses}} = 54$ ,  $N_{\text{symbiont species}} = 26$ ,  $N_{\text{studies}} = 43$ ,  $N_{\text{datapoints}} = 100$ .

**Response: Fitness drop**

| Fixed Effect      |                            | N  | Posterior mode (CI)    | pMCMC       |
|-------------------|----------------------------|----|------------------------|-------------|
| Transmission mode | Horizontal                 | 35 | 33.51 (-11.41, 69.93)  |             |
|                   | Vertical                   | 65 | 59.30 (25.54, 116.02)  |             |
|                   | Difference                 |    | -44.81 (-87.84, -5.41) | <b>0.02</b> |
| Age               | Difference of slope from 0 |    | 0.14 (-0.27, 0.47)     | <b>0.3</b>  |

**Response: Genome size**

| Fixed Effect      |                            | N  | Posterior mode (CI)  | pMCMC       |
|-------------------|----------------------------|----|----------------------|-------------|
| Transmission mode | Horizontal                 | 35 | 7.82 (1.39, 12.57)   |             |
|                   | Vertical                   | 65 | 2.51 (0.58, 4.58)    |             |
|                   | Difference                 |    | 4.16 (-0.58, 11.21)  | <b>0.04</b> |
| Age               | Difference of slope from 0 |    | -0.01 (-0.02, 0.004) | <b>0.1</b>  |



**Supplementary Table 7.** Analysis of the effect of transmission mode and age of symbiosis on fitness drop of host on symbiont removal and symbiont genome size, taking into account host phylogenetic relationships using MCMCglmm. This analysis uses a subset of the dataset where we have data on age of symbiosis:  $N_{\text{symbioses}} = 54$ ,  $N_{\text{symbiont species}} = 53$ ,  $N_{\text{studies}} = 43$ ,  $N_{\text{datapoints}} = 100$ .

**Response: Fitness drop**

| Fixed Effect      |                            | N  | Posterior mode (CI)   | pMCMC       |
|-------------------|----------------------------|----|-----------------------|-------------|
| Transmission mode | Horizontal                 | 35 | 31.98 (-14.37, 80.06) |             |
|                   | Vertical                   | 65 | 77.84 (26.36, 124.39) |             |
|                   | Difference                 |    | -40.25 (-94.28, 6.46) | <b>0.04</b> |
| Age               | Difference of slope from 0 |    | -0.0007 (-0.50, 0.36) | <b>0.43</b> |

**Response: Genome size**

| Fixed Effect      |                            | N  | Posterior mode (CI)   | pMCMC       |
|-------------------|----------------------------|----|-----------------------|-------------|
| Transmission mode | Horizontal                 | 35 | 6.10 (-2.66, 15.94)   |             |
|                   | Vertical                   | 65 | 3.05 (0.78, 4.77)     |             |
|                   | Difference                 |    | 4.51 (-5.42, 13.12)   | <b>0.13</b> |
| Age               | Difference of slope from 0 |    | -0.003 (-0.01, 0.006) | <b>0.28</b> |

**Supplementary Table 8.** Analysis of the effect of the way in which host fitness was measured on fitness drop of host, taking into account symbiont phylogenetic relationships using MCMCglmm. The category ‘resistance’ has been removed for this analysis due to lack of replication.  $N_{\text{symbioses}} = 38$ ,  $N_{\text{symbiontspecies}} = 27$ ,  $N_{\text{studies}} = 37$ ,  $N_{\text{datapoints}} = 300$ .

| <b>Response: Fitness drop</b> |                                           |          |                            |              |
|-------------------------------|-------------------------------------------|----------|----------------------------|--------------|
| <b>Fixed Effect</b>           |                                           | <b>N</b> | <b>Posterior mode (CI)</b> | <b>pMCMC</b> |
| <b>Host fitness measure</b>   | Development                               | 16       | 36.58 (14.57, 68.14)       |              |
|                               | Fecundity                                 | 97       | 47.19 (30.97, 80.69)       |              |
|                               | Size/Mass                                 | 107      | 45.02 (21.92, 74.47)       |              |
|                               | Survival                                  | 80       | 52.32 (23.12, 80.59)       |              |
| <b>Differences</b>            | Diff between development time & fecundity |          | -18.86 (-29.64, -2.88)     | <b>0.01</b>  |
|                               | Diff between development time & size/mass |          | -8.91 (-22.84, 7.69)       | <b>0.18</b>  |
|                               | Diff between development time & survival  |          | -10.17 (-30.01, 6.49)      | <b>0.09</b>  |
|                               | Diff between fecundity & size/mass        |          | 9.44 (-0.09, 18.90)        | <b>0.31</b>  |
|                               | Diff between fecundity & survival         |          | 3.02 (-14.33, 17.81)       | <b>0.36</b>  |
|                               | Diff between size/mass & survival         |          | -8.77 (-24.22, 11.13)      | <b>0.25</b>  |

**Supplementary Table 9.** Analysis of the effect of the way in which host fitness was measured on fitness drop of host, taking into account host phylogenetic relationships using MCMCglmm. The categories ‘resistance’ has been removed for this analysis due to lack of replication.  $N_{\text{hostspecies}} = 31$ ,  $N_{\text{studies}} = 40$ ,  $N_{\text{datapoints}} = 304$ .

| <b>Response: Fitness drop</b> |                                           |          |                            |              |
|-------------------------------|-------------------------------------------|----------|----------------------------|--------------|
| <b>Fixed Effect</b>           |                                           | <b>N</b> | <b>Posterior mode (CI)</b> | <b>pMCMC</b> |
| <b>Host fitness measure</b>   | Development                               | 16       | 32.54 (5.14, 59.86)        |              |
|                               | Fecundity                                 | 99       | 48.76 (26.97, 79.06)       |              |
|                               | Size/Mass                                 | 107      | 37.12 (14.59, 66.13)       |              |
|                               | Survival                                  | 82       | 40.26 (10.34, 66.31)       |              |
| <b>Differences</b>            | Diff between development time & fecundity |          | -22.23 (-32.77, -5.41)     | <b>0.004</b> |
|                               | Diff between development time & size/mass |          | -6.51 (-25.28, 4.74)       | <b>0.12</b>  |
|                               | Diff between development time & survival  |          | -9.96 (-25.59, 7.85)       | <b>0.18</b>  |
|                               | Diff between fecundity & size/mass        |          | 11.71 (0.54, 18.55)        | <b>0.02</b>  |
|                               | Diff between fecundity & survival         |          | 9.45 (-3.51, 24.04)        | <b>0.07</b>  |
|                               | Diff between size/mass & survival         |          | 0.76 (-14.67, 18.05)       |              |

**Supplementary Table 10.** Analysis of the effect of transmission mode on fitness drop of host on symbiont removal and symbiont genome size, taking into account symbiont phylogenetic relationships using MCMCglmm. This analysis uses a subset of the dataset where host fitness was measured as fecundity:  $N_{\text{symbioses}} = 26$ ,  $N_{\text{symbiontspecies}} = 18$ ,  $N_{\text{studies}} = 29$ ,  $N_{\text{datapoints}} = 102$ .

| <b>Response: Fitness drop</b> |                          |          |                            |                  |
|-------------------------------|--------------------------|----------|----------------------------|------------------|
| <b>Fixed Effect</b>           |                          | <b>N</b> | <b>Posterior mode (CI)</b> | <b>pMCMC</b>     |
| Transmission mode             | Horizontal               | 21       | -15.96 (-82.24, 41.79)     |                  |
|                               | Vertical                 | 81       | 23.09 (-30.49, 84.30)      |                  |
|                               | Difference               |          | -50.89 (-85.68, -4.41)     | <b>0.02</b>      |
| <b>Response: Genome size</b>  |                          |          |                            |                  |
| <b>Fixed Effect</b>           |                          | <b>N</b> | <b>Posterior mode</b>      | <b>pMCMC</b>     |
| Transmission mode             | Horizontal               | 21       | 8.61 (6.68, 10.62)         |                  |
|                               | Vertical                 | 81       | 1.59 (0.36, 3.15)          |                  |
|                               | Difference               |          | 7.02 (5.16, 8.47)          | <b>&lt;0.001</b> |
| <b>Correlations</b>           |                          |          |                            |                  |
| Fitness drop : Genome size    | Phylogenetic correlation |          | -0.73 (-0.95, 0.70)        | <b>0.34</b>      |
|                               | Phenotypic correlation   |          | -0.07 (-0.31, 0.29)        | <b>0.48</b>      |

**Supplementary Table 11.** Analysis of the effect of transmission mode on fitness drop of host on symbiont removal and symbiont genome size, taking into account host phylogenetic relationships using MCMCglmm. This analysis uses a subset of the dataset where host fitness was measured as fecundity:  $N_{\text{hostspecies}} = 22$ ,  $N_{\text{studies}} = 30$ ,  $N_{\text{datapoints}} = 102$ .

| <b>Response: Fitness drop</b> |                          |          |                            |                  |
|-------------------------------|--------------------------|----------|----------------------------|------------------|
| <b>Fixed Effect</b>           |                          | <b>N</b> | <b>Posterior mode (CI)</b> | <b>pMCMC</b>     |
| Transmission mode             | Horizontal               | 21       | -34.20 (-84.73, 29.34)     |                  |
|                               | Vertical                 | 81       | 23.11 (-28.64, 72.20)      |                  |
|                               | Difference               |          | -43.32 (-86.98, -12.12)    | <b>0.006</b>     |
| <b>Response: Genome size</b>  |                          |          |                            |                  |
| <b>Fixed Effect</b>           |                          | <b>N</b> | <b>Posterior mode</b>      | <b>pMCMC</b>     |
| Transmission mode             | Horizontal               | 21       | 9.01 (6.37, 10.82)         |                  |
|                               | Vertical                 | 81       | 1.96 (0.03, 3.49)          |                  |
|                               | Difference               |          | 7.37 (4.39, 9.68)          | <b>&lt;0.001</b> |
| <b>Correlations</b>           |                          |          |                            |                  |
| Fitness drop : Genome size    | Phylogenetic correlation |          | -0.52 (-0.89, 0.86)        | <b>0.50</b>      |
|                               | Phenotypic correlation   |          | -0.02 (-0.30, 0.33)        | <b>0.49</b>      |

**Supplementary Table 12.** Analysis of the effect of transmission mode, intra/extracellular and symbiont function on fitness drop of host on symbiont removal and symbiont genome size, taking into account symbiont phylogenetic relationships using MCMCglmm. Two symbiont species, *Verminephrobacter* and *Regiella insecticola* have been reassigned as horizontal transmission, to account for the possible influence of biparental transmission on host fitness drop.  $N_{\text{symbioses}} = 106$ ,  $N_{\text{symbiont species}} = 58$ ,  $N_{\text{studies}} = 84$ ,  $N_{\text{datapoints}} = 378$ .

**Response: Fitness drop**

| Fixed Effect        |                                      | N   | Posterior mode (CI)    | pMCMC        |
|---------------------|--------------------------------------|-----|------------------------|--------------|
| Transmission mode   | Horizontal                           | 133 | 30.16 (-9.14, 62.49)   |              |
|                     | Vertical                             | 245 | 58.56 (19.80, 97.33)   |              |
|                     | Difference                           |     | -26.64 (-53.44, -6.61) | <b>0.002</b> |
| Intra/extracellular | Intracellular                        | 269 | 6.67 (-30.05, 37.90)   |              |
|                     | Extracellular                        | 109 | 33.46 (-9.61, 62.70)   |              |
|                     | Difference                           |     | 23.43 (-8.51, 43.74)   | <b>0.07</b>  |
| Function            | Defensive                            | 27  | 26.27 (-11.34, 59.76)  |              |
|                     | Nutritional                          | 207 | 44.00 (17.67, 72.20)   |              |
|                     | Unknown                              | 144 | 39.07 (-0.80, 70.95)   |              |
|                     | Difference (Defensive & Nutritional) |     | -27.27 (-49.91, 10.38) | <b>0.12</b>  |

**Response: Genome size**

| Fixed Effect        |                                      | N   | Posterior mode      | pMCMC            |
|---------------------|--------------------------------------|-----|---------------------|------------------|
| Transmission mode   | Horizontal                           | 133 | 5.62 (3.75, 7.81)   |                  |
|                     | Vertical                             | 245 | 1.19 (-0.51, 3.63)  |                  |
|                     | Difference                           |     | 4.23 (2.95, 5.72)   | <b>&lt;0.001</b> |
| Intra/extracellular | Intracellular                        | 269 | 4.69 (2.52, 7.04)   |                  |
|                     | Extracellular                        | 109 | 5.91 (3.61, 8.01)   |                  |
|                     | Difference                           |     | 0.98 (-0.43, 2.64)  | <b>0.07</b>      |
| Function            | Defensive                            | 27  | 6.04 (3.63, 7.96)   |                  |
|                     | Nutritional                          | 207 | 6.37 (5.01, 8.89)   |                  |
|                     | Unknown                              | 144 | 7.61 (5.68, 9.78)   |                  |
|                     | Difference (Defensive & Nutritional) |     | -0.94 (-3.02, 0.51) | <b>0.12</b>      |

**Correlations**

|                            |                          |                     |             |
|----------------------------|--------------------------|---------------------|-------------|
| Fitness drop : Genome size | Phylogenetic correlation | -0.89 (-0.96, 0.84) | <b>0.40</b> |
|                            | Phenotypic correlation   | -0.05 (-0.18, 0.20) | <b>0.48</b> |

**Supplementary Table 13. Summary of host fitness data.** Studies from which we used data on mean % host fitness drop and the sample size (number of measures of host fitness) for each symbiont species.  $N_{\text{datapoints}}$  is the number of host fitness measures found for removal of each symbiont species.

| Symbiont                          | Mean % host fitness drop | Study Reference | Details                                                                       | $N_{\text{datapoints}}$ |
|-----------------------------------|--------------------------|-----------------|-------------------------------------------------------------------------------|-------------------------|
| Actinobacteria                    | 87.03                    | 17              | Means and fitness change from Fig. 3 for aposymbiotic and control individuals | 2                       |
| <i>Azospirillum</i>               | 12.28                    | 18              | Means taken from Tables 1, 2c, 3, 4, 5                                        |                         |
| <i>Azospirillum</i>               | 5.57                     | 3               | Means taken from Tables 1 & 2                                                 | 70                      |
| <i>Azospirillum</i>               | 4.28                     | 4               | Means taken from Table 3 (0 N fertilizer) & Table 4 (0 N fertilizer)          |                         |
| <i>Blochmannia floridanus</i>     | 70.56                    | 5               | Means taken from text (page 4, Fig. 4)                                        | 2                       |
| <i>Blochmannia floridanus</i>     | 86.50                    | 6               | Means taken from text (page 3, Fig. 1)                                        |                         |
| <i>Bradyrhizobium</i>             | 76.97                    | 7               | Means taken from Table 1 (local strains), only shoot dry weight               |                         |
| <i>Bradyrhizobium</i>             | 36.86                    | 8               | Means taken from Table 5, seed yield, no phosphorus treatment                 | 28                      |
| <i>Bradyrhizobium</i>             | 20.93                    | 9               | Means taken from Table 2, grain yield (0 N fertilizer)                        |                         |
| <i>Buchnera</i>                   | 71.13                    | 10              | Means calculated from Fig. 1b, took end point                                 | 7                       |
| <i>Buchnera</i>                   | 75.26                    | 11              | Means taken from Table 1 & 2                                                  |                         |
| <i>Burkholderia</i>               | 20.28                    | 12              | Means calculated from Fig. 3 C, D, E, F, both male and female                 | 8                       |
| <i>Coriobacterium glomerans</i>   | 59.02                    | 13              | Means calculated from Fig. 1                                                  | 1                       |
| <i>Coxiella</i>                   | 59.75                    | 14              | Means taken from Table 1                                                      | 7                       |
| <i>Erwinia</i>                    | 23.81                    | 15              | Means taken from Table 1                                                      |                         |
| <i>Erwinia dacicola</i>           | 43.80                    | 16              | Means taken from text, page 4                                                 | 10                      |
| <i>Frankia</i>                    | 61.50                    | 17              | Means taken from Table 2, total plant dry weight only<br><i>Frankia</i>       | 1                       |
| <i>Glomeribacter gigasporarum</i> | 53.17                    | 18              | Means calculated from Fig. 8 & Fig. 10, only end points taken                 | 2                       |
| <i>Gordonibacter</i>              | 6.58                     | 13              | Means calculated from Fig. 1                                                  | 1                       |
| <i>Hamiltonella</i>               | 13.10                    | 19              | Means taken from Table 2 &                                                    | 13                      |

|                                    |        |    |                                                                                                 |    |
|------------------------------------|--------|----|-------------------------------------------------------------------------------------------------|----|
| <i>defensa</i>                     |        |    | Fig. 1a                                                                                         |    |
| <i>Hamiltonella</i>                | 6.40   | 20 | Means calculated from raw data given in Appendix 1                                              |    |
| <i>defensa</i>                     |        |    | Means calculated from Fig. 1A for strains Co08, Co23, Co26 & Co37                               |    |
| <i>Hamiltonella</i>                | -10.45 | 21 |                                                                                                 |    |
| <i>defensa</i>                     |        |    |                                                                                                 |    |
| <i>Nardonella</i>                  | 15.68  | 22 | Means calculated from Fig. 3, both male and female                                              | 5  |
| symbiont of <i>Plautia stali</i>   | 99.08  | 23 | Raw data provided by Takahiro Hosokawa                                                          | 70 |
| <i>Regiella insecticola</i>        | -3.77  | 24 | Means calculated from Fig. 1a                                                                   |    |
| <i>Regiella insecticola</i>        | -2.47  | 19 | Means taken from Table 2 & Fig. 1a                                                              | 6  |
| <i>Regiella insecticola</i>        | 34.15  | 25 | Calculated means from raw data from Fig. 2 provided by Christoph Vorburger                      |    |
| <i>Rhodococcus rhodnii</i>         | 7.73   | 26 | Means taken from Table 1 sym <i>in vitro</i> and apo <i>in vitro</i> only for unfed individuals | 1  |
| <i>Rickettsia</i>                  | -26.17 | 27 | Means taken from Table 1, excluding individuals infected with both symbionts.                   |    |
| <i>Rickettsia</i>                  | -10.78 | 28 | Means calculated from Fig. 1 and Table 1                                                        |    |
| <i>Rickettsia</i>                  | -8.79  | 29 | Means taken from Table 1                                                                        | 29 |
| <i>Rickettsia</i>                  | 0.93   | 30 | Means taken from Table 1                                                                        |    |
| <i>Rickettsia</i>                  | 33.60  | 31 | Calculated means of Fig. 3 from raw data provided by Martha Hunter                              |    |
| <i>Serratia symbiotica</i>         | -23.67 | 27 | Means taken from Table 1, excluding individuals                                                 |    |
| <i>Serratia symbiotica</i>         | 81     | 28 | Means calculated from Fig. 1 and Table 1                                                        |    |
| <i>Serratia symbiotica</i>         | 15.07  | 32 | Means calculated from Fig. 1                                                                    | 31 |
| <i>Serratia symbiotica</i>         | 6.54   | 24 | Means calculated from Fig. 1a                                                                   |    |
| <i>Serratia symbiotica</i>         | 23.21  | 19 | Means taken from Table 2 & Fig. 1a                                                              |    |
| <i>Serratia symbiotica</i>         | -7.83  | 33 | Means taken from Table 1                                                                        |    |
| <i>Sinorhizobium meliloti</i>      | 14.26  | 34 | Means taken from Fig. 1 & 2                                                                     | 4  |
| <i>Spirochaetes bacteria</i>       | 94.73  | 35 | Means taken from Table 1, only when B and no S, F or P                                          | 1  |
| <i>Spiroplasma</i>                 | -22.45 | 36 | Means taken from Table 4                                                                        |    |
| <i>Spiroplasma</i>                 | 37.72  | 37 | Means calculated from Table 1 & Fig. 1                                                          | 10 |
| <i>Streptomyces</i>                | 91.96  | 38 | Mean calculated from text page 3                                                                | 1  |
| <i>Verminephrobacter</i>           | 31.05  | 39 | Means calculated from Fig. 4 (only hatched data)                                                | 2  |
| <i>Wigglesworthia glossinidius</i> | 74     | 40 | Means calculated from Fig. 5, only took end point                                               | 10 |



|                                                |        |    |                                                                      |    |
|------------------------------------------------|--------|----|----------------------------------------------------------------------|----|
| <i>Wolbachia</i>                               | -1.98  | 41 | Means taken from text page 5                                         |    |
| <i>Wolbachia</i>                               | -4.75  | 42 | Means taken from Table 3                                             |    |
| <i>Wolbachia</i>                               | 100    | 43 | Means taken from Table 3<br>only from tetracycline                   |    |
| <i>Wolbachia</i>                               | 60.94  | 44 | Means calculated from Fig<br>1., highest antibiotic<br>concentration |    |
| <i>Wolbachia</i>                               | 17.83  | 45 | Means taken from Table 1,<br>only WxW and UxU                        | 52 |
| <i>Wolbachia</i>                               | 94.24  | 46 | Means taken from Table 2                                             |    |
| <i>Wolbachia</i>                               | -12.52 | 47 | Means taken from Table 1                                             |    |
| <i>Wolbachia</i>                               | 6.75   | 48 | Means calculated from Fig.<br>2, 3 & 4                               |    |
| <i>Wolbachia</i>                               | 14.90  | 49 | Means taken from Fig. 1<br>legend                                    |    |
| <i>Wolbachia</i>                               | 74.41  | 50 | Means calculated from Fig. 3                                         |    |
| chemoautotrophic<br>symbiont of <i>Codakia</i> | 47.06  | 51 | Means taken from text on<br>page 7                                   | 1  |

**Supplementary Table 14.** Summary of symbiont transmission modes, genome sizes and age of association with hosts.

| Symbiont species                                     | Transmission mode | General reference(s) | Symbiont genome size | Age of symbiosis in millions of years (mean) | Genome/age reference(s) |
|------------------------------------------------------|-------------------|----------------------|----------------------|----------------------------------------------|-------------------------|
| Actinobacteria                                       | Vertical          | <sup>1,52</sup>      | -                    | -                                            | -                       |
| <i>Aliivibrio fischeri</i>                           | Horizontal        | <sup>53</sup>        | 4.27                 | 60                                           | Ned Ruby, pers.comm.    |
| <i>Nostoc azollae</i><br>( <i>Anabaena azollae</i> ) | Vertical          | <sup>54,55</sup>     | 5.49                 | 140                                          | <sup>54</sup>           |
| <i>Azobacteroides pseudotrichonymphae</i>            | Vertical          | <sup>56</sup>        | 1.11                 | -                                            | -                       |
| <i>Azospirillum</i>                                  | Horizontal        | -                    | 7.39                 | -                                            | -                       |
| <i>Baumannia cicadellincola</i>                      | Vertical          | <sup>57</sup>        | 0.68                 | 70-100 (85)                                  | <sup>58</sup>           |
| <i>Blattabacterium</i>                               | Vertical          | <sup>57</sup>        | 0.64                 | 150                                          | <sup>59</sup>           |
| <i>Blochmannia floridanus</i>                        | Vertical          | <sup>57</sup>        | 0.71                 | 50                                           | <sup>60</sup>           |
| <i>Bradyrhizobium</i>                                | Horizontal        | -                    | 9.21                 | 62                                           | <sup>61</sup>           |
| <i>Buchnera</i>                                      | Vertical          | <sup>62</sup>        | 0.64                 | 180                                          | <sup>57</sup>           |
| <i>Burkholderia</i>                                  | Horizontal        | <sup>12</sup>        | 6.96                 | -                                            | -                       |
| <i>Burkholderia brachyanthoides</i>                  | Vertical          | <sup>63</sup>        | 3.55                 | 12                                           | <sup>64</sup>           |
| <i>Burkholderia calva</i>                            | Vertical          | <sup>63</sup>        | 4.21                 | 12                                           | <sup>64</sup>           |
| <i>Burkholderia crenata</i>                          | Vertical          | <sup>63</sup>        | 2.84                 | 12                                           | <sup>64</sup>           |
| <i>Burkholderia humilis</i>                          | Vertical          | <sup>63</sup>        | 5.15                 | 12                                           | <sup>64</sup>           |
| <i>Burkholderia kirkii</i>                           | Vertical          | <sup>63</sup>        | 4                    | 12                                           | <sup>64</sup>           |
| <i>Burkholderia pumila</i>                           | Vertical          | <sup>63</sup>        | 3.68                 | 12                                           | <sup>64</sup>           |
| <i>Burkholderia schumannianaie</i>                   | Vertical          | <sup>63</sup>        | 2.36                 | 12                                           | <sup>64</sup>           |
| <i>Burkholderia verschuerenii</i>                    | Vertical          | <sup>63</sup>        | 6.19                 | 12                                           | <sup>64</sup>           |
| <i>Carsonella ruddii</i>                             | Vertical          | <sup>57</sup>        | 0.16                 | 120                                          | <sup>57,65</sup>        |
| chemoautotrophic symbiont of <i>Codakia</i>          | Horizontal        | <sup>51</sup>        | -                    | -                                            | -                       |
| <i>Coriobacterium glomerans</i>                      | Vertical          | <sup>13</sup>        | 2.12                 | -                                            | -                       |
| <i>Coxiella</i>                                      | Vertical          | <sup>14</sup>        | 0.66                 | -                                            | -                       |
| <i>Endoriftia persephone</i>                         | Horizontal        | <sup>66</sup>        | 3.2                  | -                                            | <sup>66</sup>           |
| <i>Erwinia</i>                                       | Horizontal        | <sup>15</sup>        | -                    | -                                            | -                       |
| <i>Erwinia dacicola</i>                              | Vertical          | <sup>16</sup>        | -                    | -                                            | -                       |
| <i>Frankia</i>                                       | Horizontal        | -                    | 7.5                  | -                                            | -                       |
| <i>Gilliamella apicola</i>                           | Vertical          | <sup>67</sup>        | 2.24                 | -                                            | -                       |
| <i>Glomeribacter gigasporarum</i>                    | Vertical          | <sup>18</sup>        | 1.73                 | -                                            | -                       |
| <i>Gordonibacter</i>                                 | Vertical          | <sup>13</sup>        | -                    | -                                            | -                       |
| <i>Hamiltonella defensa</i>                          | Vertical          | <sup>19</sup>        | 1.84                 | -                                            | -                       |
| <i>Hodgkinia cicadinicola</i>                        | Vertical          | <sup>68</sup>        | 0.15                 | -                                            | -                       |
| <i>Ishikawaella capsulata</i>                        | Vertical          | <sup>57</sup>        | 0.75                 | -                                            | -                       |

|                                    |            |               |      |               |               |
|------------------------------------|------------|---------------|------|---------------|---------------|
| <i>Mesorhizobium loti</i>          | Horizontal | -             | 7.33 | 62            | 61            |
| <i>Moranella endobia</i>           | Vertical   | <sup>68</sup> | 0.54 | -             | -             |
| <i>Nardonella</i>                  | Vertical   | <sup>22</sup> | -    | -             | -             |
| symbiont of <i>Plautia stali</i>   | Vertical   | <sup>23</sup> | -    | -             | -             |
| <i>Regiella insecticola</i>        | Vertical   | <sup>19</sup> | 2.04 | -             | -             |
| <i>Rhodococcus rhodnii</i>         | Vertical   | <sup>69</sup> | 8.4  | -             | -             |
| <i>Rickettsia</i>                  | Vertical   | -             | -    | -             | -             |
| <i>Riesia pediculicola</i>         | Vertical   | <sup>53</sup> | 0.58 | -             | -             |
| <i>Rosenkranzia clausaccus</i>     | Vertical   | <sup>70</sup> | 0.94 | -             | -             |
| <i>Ruthia magnifica</i>            | Vertical   | <sup>66</sup> | 1.2  | -             | <sup>71</sup> |
| <i>Serratia symbiotica</i>         | Vertical   | <sup>19</sup> | 3.19 | -             | -             |
| <i>Sinorhizobium meliloti</i>      | Horizontal | -             | 7    | 62            | 61            |
| <i>Snodgrassella alvi</i>          | Vertical   | <sup>72</sup> | 2.33 | -             | -             |
| <i>Spirochaetes</i> bacteria       | Vertical   | <sup>35</sup> | -    | -             | -             |
| <i>Streptomyces philanthii</i>     | Vertical   | <sup>73</sup> | -    | 68            | <sup>73</sup> |
| <i>Sulcia muelleri</i>             | Vertical   | <sup>57</sup> | 0.21 | 260           | <sup>58</sup> |
| <i>Tremblaya princeps</i>          | Vertical   | <sup>68</sup> | 0.14 | 100-200 (150) | <sup>65</sup> |
| <i>Uzinura diaspidicola</i>        | Vertical   | <sup>57</sup> | 0.26 | 100           | <sup>74</sup> |
| <i>Verminephrobacter</i>           | Vertical   | <sup>75</sup> | 5.6  | 62-136 (99)   | <sup>75</sup> |
| <i>Vesicomysocius okutanii</i>     | Vertical   | <sup>66</sup> | 1    | -             | <sup>76</sup> |
| <i>Wigglesworthia glossinidius</i> | Vertical   | <sup>57</sup> | 0.71 | 40            | <sup>77</sup> |
| <i>Wolbachia</i>                   | Vertical   | -             | -    | -             | -             |
| <i>Zinderia insecticola</i>        | Vertical   | <sup>68</sup> | 0.21 | -             | -             |

## Supplementary References

1. Salem, H., Kreutzer, E. & Sudakaran, S. Actinobacteria as essential symbionts in firebugs and cotton stainers (Hemiptera, Pyrrhocoridae) *Environmental Microbiology* **15** 1956-1968 (2013).
2. Kapulnik, Y., Sarig, S., Nur, I. & Okon, Y. Yield Increases in Summer Cereal Crops in Israeli Fields Inoculated with Azospirillum. *Experimental Agriculture* **17**, 179–187 (1981).
3. Rao, R., Nayak, D. N. & Charyulu, P. Yield response of rice to root inoculation with Azospirillum. *Journal of Agricultural Science* **100**, 689–691 (1983).
4. Kapulnik, Y., Okon, Y. & Henis, Y. Yield response of spring wheat cultivars (*Triticum aestivum* and *T. turgidum*) to inoculation with *Azospirillum brasilense* under field conditions. *Biology and Fertility of Soils* **4**, 27–35 (1987).
5. Zientz, E., Beyaert, I., Gross, R. & Feldhaar, H. Relevance of the endosymbiosis of *Blochmannia floridanus* and carpenter ants at different stages of the life cycle of the host. *Applied and Environmental Microbiology* **72**, 6027–6033 (2006).
6. Feldhaar, H. *et al.* Nutritional upgrading for omnivorous carpenter ants by the endosymbiont *Blochmannia*. *BMC Biol.* **5**, (2007).
7. Hafeez, F., S, H., T, A. & K, M. Competition between effective and less effective strains of *Bradyrhizobium* spp. for nodulation on *Vigna radiata*. *Biology and Fertility of Soils* **33**, 382–386 (2001).
8. Abbasi, M. K., Majeed, A., Sadiq, A. & Khan, S. R. Application of *Bradyrhizobium japonicum* and Phosphorus Fertilization Improved Growth, Yield and Nodulation of Soybean in the Sub-humid Hilly Region of Azad Jammu and Kashmir, Pakistan. *Plant Prod. Sci.* **11**, 368–376 (2008).
9. Delić, D. & Stajković-Srbinić, O. Delic *et al.* Effect of bradyrhizobial inoculation on growth and seed yield of mungbean in Fluvisol and Humofluvisol. *African Journal of Microbiology Research* **5**, 3946–3957 (2011).
10. Douglas, A. E. Reproductive failure and the free amino acid pools in pea aphids (*Acyrtosiphon pisum*) lacking symbiotic bacteria. *Journal of Insect Physiology* **42**, 247–255 (1996).
11. Caillaud, C. M. & Rahbe, Y. Aposymbiosis in a cereal aphid: reproductive failure and influence on plant utilization. *Ecol Entomol* **24**, 111–114 (1999).
12. Kikuchi, Y., Hosokawa, T. & Fukatsu, T. Insect-microbe mutualism without vertical transmission: a stinkbug acquires a beneficial gut symbiont from the environment every generation. *Applied and Environmental Microbiology* **73**, 4308–4316 (2007).
13. Salem, H. *et al.* Vitamin supplementation by gut symbionts ensures metabolic homeostasis in an insect host. *Proceedings of the Royal Society B: Biological Sciences* **281**, (2014).
14. Zhong, J., Jasinskas, A. & Barbour, A. G. Antibiotic Treatment of the Tick Vector *Amblyomma americanum* Reduced Reproductive Fitness. *PLoS ONE* **2**, 1–7 (2007).
15. de Vries, E. J., Jacobs, G., Sabelis, M. W., Menken, S. B. J. & Breeuwer, J. A. J. Diet-Dependent Effects of Gut Bacteria on Their Insect Host: The Symbiosis of *Erwinia* sp. and Western Flower Thrips. *Proceedings of the Royal Society B: Biological Sciences* **271**, 2171–2178 (2004).
16. Ben-Yosef, M., Aharon, Y., Jurkevitch, E. & Yuval, B. Give us the tools and we will do the job: symbiotic bacteria affect olive fly fitness in a diet-dependent fashion. *Proceedings of the Royal Society B: Biological Sciences* **277**, 1545–1552 (2010).
17. Oliveira, R. S., Castro, P. M. L., Dodd, J. C. & Vosátka, M. Synergistic effect of *Glomus intraradices* and *Frankia* spp. on the growth and stress recovery of *Alnus*

- glutinosa in an alkaline anthropogenic sediment. *Chemosphere* **60**, 1462–1470 (2005).
18. Lumini, E. *et al.* Presymbiotic growth and sporal morphology are affected in the arbuscular mycorrhizal fungus *Gigaspora margarita* cured of its endobacteria. *Cell. Microbiol.* **9**, 1716–1729 (2007).
  19. Russell, J. A. & Moran, N. A. Costs and benefits of symbiont infection in aphids: variation among symbionts and across temperatures. *Proceedings of the Royal Society B: Biological Sciences* **273**, 603–610 (2006).
  20. Castañeda, L. E. & Sandrock, C. Variation and covariation of life history traits in aphids are related to infection with the facultative bacterial endosymbiont *Hamiltonella defensa*. *Biological Journal of the Linnean Society* **100**, 237–247 (2010).
  21. Łukasik, P., Dawid, M. A., Ferrari, J. & Godfray, H. C. J. The diversity and fitness effects of infection with facultative endosymbionts in the grain aphid, *Sitobion avenae*. *Oecologia* 1–12 (2013). doi:10.1007/s00442-013-2660-5
  22. Kuriwada, T., Hosokawa, T., Kumano, N. & Shiromoto, K. Biological Role of *Nardonella* Endosymbiont in Its Weevil Host. *PLoS ONE* **5**, 1–7 (2010).
  23. Hosokawa, T., Ishii, Y., Nikoh, N., Fujie, M. & Satoh, N. Obligate bacterial mutualists evolving from environmental bacteria in natural insect populations. *Nature Microbiology*. **1** (2016).
  24. Leonardo, T. E. Removal of a specialization-associated symbiont does not affect aphid fitness. *Ecology Letters* **7**, 461–468 (2004).
  25. Vorburger, C., Gehrler, L. & Rodriguez, P. A strain of the bacterial symbiont *Regiella insecticola* protects aphids against parasitoids. *Biology Letters* **6**, 109–111 (2010).
  26. Schaub, G. A. & Eichler, S. The effects of aposymbiosis and of an infection with *Blastocrithidia triatomae* (Trypanosomatidae) on the tracheal system of the reduviid bugs *Rhodnius prolixus* and *Triatoma infestans*. *Journal of Insect Physiology* **44**, 131–140 (1998).
  27. Chen, D.-Q., Montllor, C. B. & Purcell, A. H. Fitness effects of two facultative endosymbiotic bacteria on the pea aphid, *Acyrtosiphon pisum*, and the blue alfalfa aphid, *A. kondoi*. *Entomologia Experimentalis et Applicata* **95**, 315–323 (2000).
  28. Montllor, C. B., Maxmen, A. & Purcell, A. H. Facultative bacterial endosymbionts benefit pea aphids *Acyrtosiphon pisum* under heat stress. *Ecol Entomol* **27**, 189–195 (2002).
  29. Sakurai, M., Koga, R., Tsuchida, T., Meng, X.-Y. & Fukatsu, T. *Rickettsia* Symbiont in the Pea Aphid *Acyrtosiphon pisum*: Novel Cellular Tropism, Effect on Host Fitness, and Interaction with the Essential Symbiont *Buchnera*. *Applied and Environmental Microbiology* **71**, 4069–4075 (2005).
  30. Chiel, E. *et al.* Assessments of Fitness Effects by the Facultative Symbiont *Rickettsia* in the Sweetpotato Whitefly (Hemiptera: Aleyrodidae). *Ecology and Population Biology* **102**, 413–418 (2009).
  31. Himler, A. G. *et al.* Rapid spread of a bacterial symbiont in an invasive whitefly is driven by fitness benefits and female bias. *Science* **332**, 254–256 (2011).
  32. Koga, R., Tsuchida, T. & Fukatsu, T. Changing partners in an obligate symbiosis: a facultative endosymbiont can compensate for loss of the essential endosymbiont *Buchnera* in an aphid. *Proceedings of the Royal Society B: Biological Sciences* **270**, 2543–2550 (2003).
  33. Koga, R., Tsuchida, T., Sakurai, M. & Fukatsu, T. Selective elimination of aphid endosymbionts: effects of antibiotic dose and host genotype, and fitness consequences. *Fems Microbiol Ecol* **60**, 229–239 (2007).
  34. Heath, K. D. & Lau, J. A. Herbivores alter the fitness benefits of a plant–rhizobium mutualism. *Acta Oecologica* **37**, 87–92 (2011).

35. Eutick, M. L., Veivers, P., O'Brien, R. W. & Slaytor, M. Dependence of the higher termite, *Nasutitermes exitiosus* and the lower termite, *Coptotermes lacteus* on their gut flora. *Journal of Insect Physiology* **24**, 363–368 (1978).
36. Fukatsu, T., Tsuchida, T., Nikoh, N. & Koga, R. *Spiroplasma* Symbiont of the Pea Aphid, *Acyrtosiphon pisum* (Insecta: Homoptera). *Applied and Environmental Microbiology* (2001).
37. Xie, J., Vilchez, I. & Mateos, M. *Spiroplasma* Bacteria Enhance Survival of *Drosophila hydei* Attacked by the Parasitic Wasp *Leptopilina heterotoma*. *PLoS ONE* **5**, 1–7 (2010).
38. Kaltenpoth, M., Gottler, W., Herzner, G. & Strohm, E. Symbiotic bacteria protect wasp larvae from fungal infestation. *Current Biology* **15**, 475–479 (2005).
39. Lund, M. B., Holmstrup, M., Lomstein, B. A., Damgaard, C. & Schramm, A. Beneficial Effect of Verminephrobacter Nephridial Symbionts on the Fitness of the Earthworm *Aporrectodea tuberculata*. *Applied and Environmental Microbiology* **76**, 4738–4743 (2010).
40. Pais, R., Lohs, C., Wu, Y., Wang, J. & Aksoy, S. The obligate mutualist *Wigglesworthia glossinidia* influences reproduction, digestion, and immunity processes of its host, the tsetse fly. *Applied and Environmental Microbiology* **74**, 5965–5974 (2008).
41. Hoffmann, A. A., Clancy, D. J. & Merton, E. Cytoplasmic incompatibility in Australian populations of *Drosophila melanogaster*. *Genetics* **136**, 993–999 (1994).
42. Fleury, F., Vavre, F., Ris, N. & Fouillet, P. Physiological cost induced by the maternally-transmitted endosymbiont *Wolbachia* in the *Drosophila* parasitoid *Leptopilina heterotoma*. *Parasitology* **121**, 493–500 (2000).
43. Dedeine, F. *et al.* Removing symbiotic *Wolbachia* bacteria specifically inhibits oogenesis in a parasitic wasp. *Proceedings of the Royal Society B: Biological Sciences* **98**, 6247–6252 (2001).
44. Rao, R. & Weil, G. J. In vitro Effects of Antibiotics on *Brugia malayi* Worm Survival and Reproduction. *The Journal of Parasitology* **88**, 605–611 (2002).
45. Vala, F., Van Opijnen, T., Breeuwer, J. A. J. & Sabelis, M. W. Genetic Conflicts over Sex Ratio: Mite- Endosymbiont Interactions. *The American Naturalist* **161**, 254–266 (2003).
46. Dedeine, F., Boulétreau, M. & Vavre, F. *Wolbachia* requirement for oogenesis: occurrence within the genus *Asobara* (Hymenoptera, Braconidae) and evidence for intraspecific variation in *A. tabida*. *Heredity* **95**, 394–400 (2005).
47. Fytrou, A., Schofield, P. G., Kraaijeveld, A. R. & Hubbard, S. F. *Wolbachia* Infection Suppresses Both Host Defence and Parasitoid Counter-Defence. *Proceedings of the Royal Society B: Biological Sciences* **273**, 791–796 (2006).
48. Brownlie, J. C., Cass, B. N., Riegler, M. & Witsenburg, J. J. Evidence for Metabolic Provisioning by a Common Invertebrate Endosymbiont, *Wolbachia pipientis*, during Periods of Nutritional Stress. *PLoS Pathogens* **5**, 1–5 (2009).
49. Ikeya, T., Broughton, S., Alic, N., Grandison, R. & Partridge, L. The Endosymbiont *Wolbachia* Increases Insulin/IGF-Like Signalling in *Drosophila*. *Proceedings: Biological Sciences* **276**, 3799–3807 (2009).
50. Hosokawa, T., Koga, R., Kikuchi, Y., Meng, X.-Y. & Fukatsu, T. *Wolbachia* as a bacteriocyte-associated nutritional mutualist. *Proceedings of the National Academy of Sciences of the United States of America* **107**, 769–774 (2010).
51. Gros, O., Frenkiel, L. & Mouëza, M. Gill filament differentiation and experimental colonization by symbiotic bacteria in aposymbiotic juveniles of *Codakia orbicularis* (Bivalvia: Lucinidae). *Invertebrate Reproduction & Development* **34**, 219–231 (1998).

52. Salem, H., Florez, L., Gerardo, N. & Kaltenpoth, M. An out-of-body experience: the extracellular dimension for the transmission of mutualistic bacteria in insects. *Proceedings of the Royal Society B: Biological Sciences* **282**, (2015).
53. Bright, M. & Bulgheresi, S. A complex journey: transmission of microbial symbionts. *Nat Rev Microbiol* **8**, 218–230 (2010).
54. Ran, L. *et al.* Genome erosion in a nitrogen-fixing vertically transmitted endosymbiotic multicellular cyanobacterium. *PLoS ONE* **5**, e11486 (2010).
55. Peters, G. A. & Mayne, B. C. The Azolla, *Anabaena azollae* Relationship. *Plant Physiology* (1974).
56. Hongoh, Y., Sharma, V. K., Prakash, T., Noda, S. & Toh, H. Genome of an Endosymbiont Coupling N<sub>2</sub> Fixation to Cellulolysis Within Protist Cells in Termite Gut. *Science* (2008).
57. Moran, N. A., McCutcheon, J. P. & Nakabachi, A. Genomics and Evolution of Heritable Bacterial Symbionts. *Annual Review of Genetics* **42**, 165–190 (2008).
58. Moran, N. A., Russell, J. A., Koga, R. & Fukatsu, T. Evolutionary Relationships of Three New Species of Enterobacteriaceae Living as Symbionts of Aphids and Other Insects. *Applied and Environmental Microbiology* **71**, 3302–3310 (2005).
59. Lo, N., Bandi, C., Watanabe, H., Nalepa, C. & Beninati, T. Evidence for cocladogenesis between diverse dictyopteran lineages and their intracellular endosymbionts. *Mol. Biol. Evol.* **20** 907–913 (2003).
60. Sauer, C., Stackebrandt, E., Gadau, J., Holldobler, B. & Gross, R. Systematic relationships and cospeciation of bacterial endosymbionts and their carpenter ant host species: proposal of the new taxon *Candidatus Blochmannia* gen. nov. *Int. J. Syst. Evol. Microbiol.* **50**, 1877–1886 (2000).
61. Werner, G. D. A., Cornwell, W. K., Sprent, J. I., Kattge, J. & Kiers, E. T. A single evolutionary innovation drives the deep evolution of symbiotic N<sub>2</sub>-fixation in angiosperms. *Nat Communications* **5** (2014).
62. Douglas, A. E. Host benefit and the evolution of specialization in symbiosis. *Heredity* **81**, 599–603 (1998).
63. Lemaire, B., Janssens, S., Smets, E. & Dessein, S. Endosymbiont Transmission Mode in Bacterial Leaf Nodulation as Revealed by a Population Genetic Study of *Psychotria leptophylla*. *Applied and Environmental Microbiology* **78**, 284–287 (2012).
64. Lemaire, B., Vandamme, P., Merckx, V., Smets, E. & Dessein, S. Bacterial Leaf Symbiosis in Angiosperms: Host Specificity without Co-Speciation. *PLoS ONE* **6**, 1–10 (2011).
65. Baumann, P. Biology bacteriocyte-associated endosymbionts of plant sap-sucking insects. *Annu. Rev. Microbiol.* **59**, 155–189 (2005).
66. Kleiner, M., Petersen, J. M. & Dubilier, N. Convergent and divergent evolution of metabolism in sulfur-oxidizing symbionts and the role of horizontal gene transfer. *Current Opinion in Microbiology* **15**, 621–631 (2012).
67. Kwong, W. K. & Moran, N. A. Cultivation and characterization of the gut symbionts of honey bees and bumble bees: description of *Snodgrassella alvi* gen. nov., sp. nov., a member of the family Neisseriaceae of the Betaproteobacteria, and *Gilliamella apicola* gen. nov., sp. nov., a member of Orbaceae fam. nov., Orbales ord. nov., a sister taxon to the order ‘Enterobacteriales’ of the Gammaproteobacteria. *Int. J. Syst. Evol. Microbiol.* **63**, 2008–2018 (2013).
68. McCutcheon, J. P. & Moran, N. A. Extreme genome reduction in symbiotic bacteria. *Nat Rev Microbiol* **10**, 13–26 (2011).
69. Brecher, G. & Wigglesworth, V. B. The transmission of *Actinomyces rhodnii* Erikson in *Rhodnius prolixus* (Hemiptera) and its influence on the growth of the host.

- Parasitology* **35**, 220 (1943).
70. Kikuchi, Y. *et al.* Host-symbiont co-speciation and reductive genome evolution in gut symbiotic bacteria of acanthosomatid stinkbugs. *BMC Biol.* **7**, 2 (2009).
  71. Newton, I. L. G. *et al.* The *Calyptogena magna* Chemoautotrophic Symbiont Genome. *Science* **315**, 998–1000 (2007).
  72. Koch, H. & Schmid-Hempel, P. Socially transmitted gut microbiota protect bumble bees against an intestinal parasite. *Proceedings of the National Academy of Sciences of the United States of America* **108**, 19288–19292 (2011).
  73. Kaltenpoth, M. & Engl, T. Defensive microbial symbionts in Hymenoptera. *Funct Ecology* **28**, 315–327 (2014).
  74. Gruwell, M. E., Morse, G. E. & Normark, B. B. Phylogenetic congruence of armored scale insects (Hemiptera : Diaspididae) and their primary endosymbionts from the phylum Bacteroidetes. *Mol. Phylogenet. Evol.* **44**, 267–280 (2007).
  75. Lund, M. B., Kjeldsen, K. U. & Schramm, A. The earthworm - *Verminephrobacter* symbiosis: an emerging experimental system to study extracellular symbiosis. *Front Microbiol* **5**, (2014).
  76. Kuwahara, H. *et al.* Reduced Genome of the Thioautotrophic Intracellular Symbiont in a Deep-Sea Clam, *Calyptogena okutanii*. *Current Biology* **17**, 881–886 (2007).
  77. Chen, X., Li, S. & Aksoy, S. Concordant Evolution of a Symbiont with Its Host Insect Species: Molecular Phylogeny of Genus *Glossina* and Its Bacteriome-Associated Endosymbiont, *Wigglesworthia glossinidia*. *J Mol Evol* **48**, 49–58 (1999).
